# Supplementary material for: The global chemistry transport model TM5: description and evaluation of the tropospheric chemistry version 3.0
Source: Copernicus journal article supplement (doi:10.5194/gmd-3-445-2010), 2010-10-06
Supplement: Supplementary file [file gmd-3-445-2010-supplement.pdf]

## Supplementary material to:

### The global chemistry transport model TM5: description and evaluation of the tropospheric chemistry version 3.0

V. Huijnen<sup>1</sup>, J. Williams<sup>1</sup>, M. van Weele<sup>1</sup>, T.P.C. van Noije<sup>1</sup>, M.C. Krol<sup>2,3,4</sup>, F. Dentener<sup>5</sup>, A. Segers<sup>6</sup>, S. Houweling<sup>3,7</sup>, W. Peters<sup>2,8</sup>, A.T.J. de Laat<sup>1</sup>, K.F. Boersma<sup>1</sup>, P. Bergamaschi<sup>5</sup>, P.F.J. van Velthoven<sup>1</sup>, P. Le Sager<sup>1</sup>, H.J. Eskes<sup>1</sup>, F. Alkemade<sup>1</sup>, M.P. Scheele<sup>1</sup>, P. Nédélec<sup>9</sup>, H.-W. Pätz<sup>10</sup>

<sup>1</sup>Royal Netherlands Meteorological Institute, De Bilt, The Netherlands

<sup>2</sup>Dept. of Meteorology and Air Quality, Wageningen University, Wageningen, The Netherlands

<sup>3</sup>SRON Netherlands Institute for Space Research, Utrecht, The Netherlands

<sup>4</sup>Institute for Marine and Atmospheric Research Utrecht (IMAU), Utrecht, The Netherlands

<sup>5</sup>European Commission, Joint Research Centre, Institute for Environment and Sustainability, 21027 Ispra (VA), Italy

<sup>6</sup>TNO Built Environment and Geosciences, Department of Air Quality and Climate, Utrecht, The Netherlands

<sup>7</sup>Institute for Marine and Atmospheric Research Utrecht (IMAU), Utrecht, The Netherlands

<sup>8</sup>NOAA Earth System Research Laboratory, Boulder, CO, USA

<sup>9</sup>CNRS, Laboratoire d'Aérodynamique, 31400 Toulouse, France

<sup>10</sup>ICG-2, Forschungszentrum Jülich, Jülich, Germany

Correspondence to: V. Huijnen (huijnen@knmi.nl)

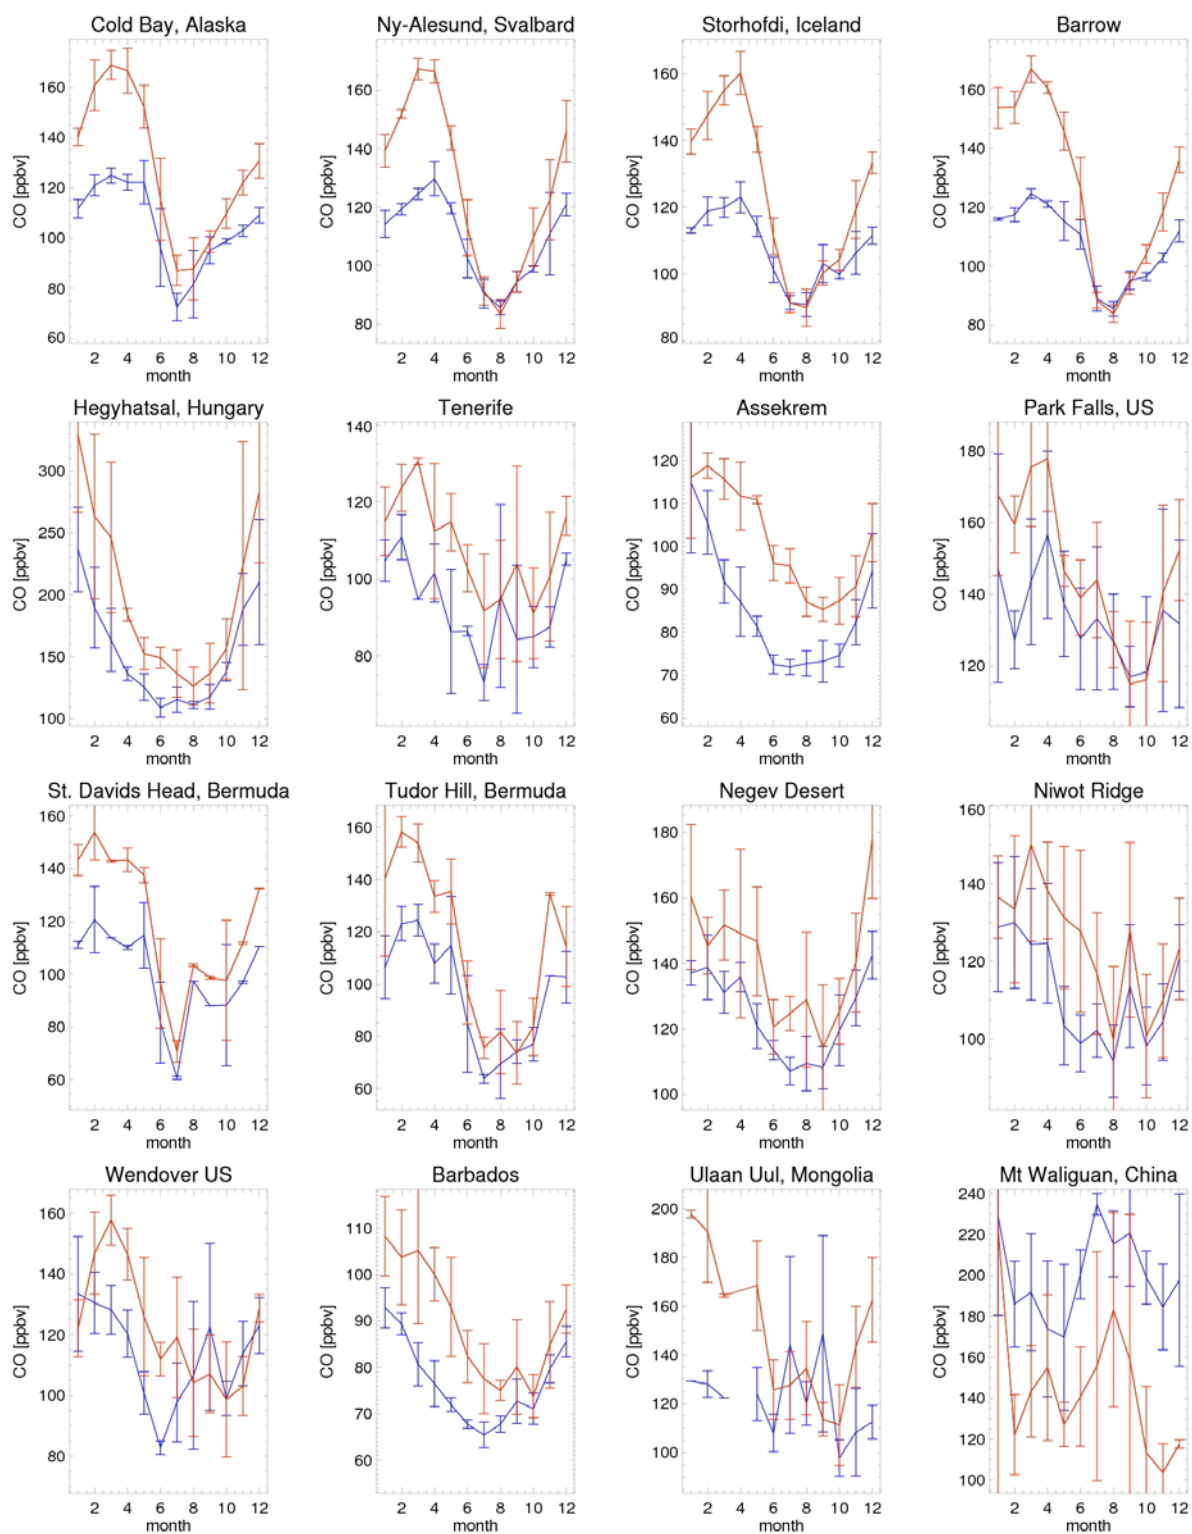

Figure S1. A comparison of the annual cycle in surface CO concentrations from TM5 (blue) to GMD station measurements (red). Model data has been sampled at the time of the observations and the bars indicate the standard deviations of the monthly mean.

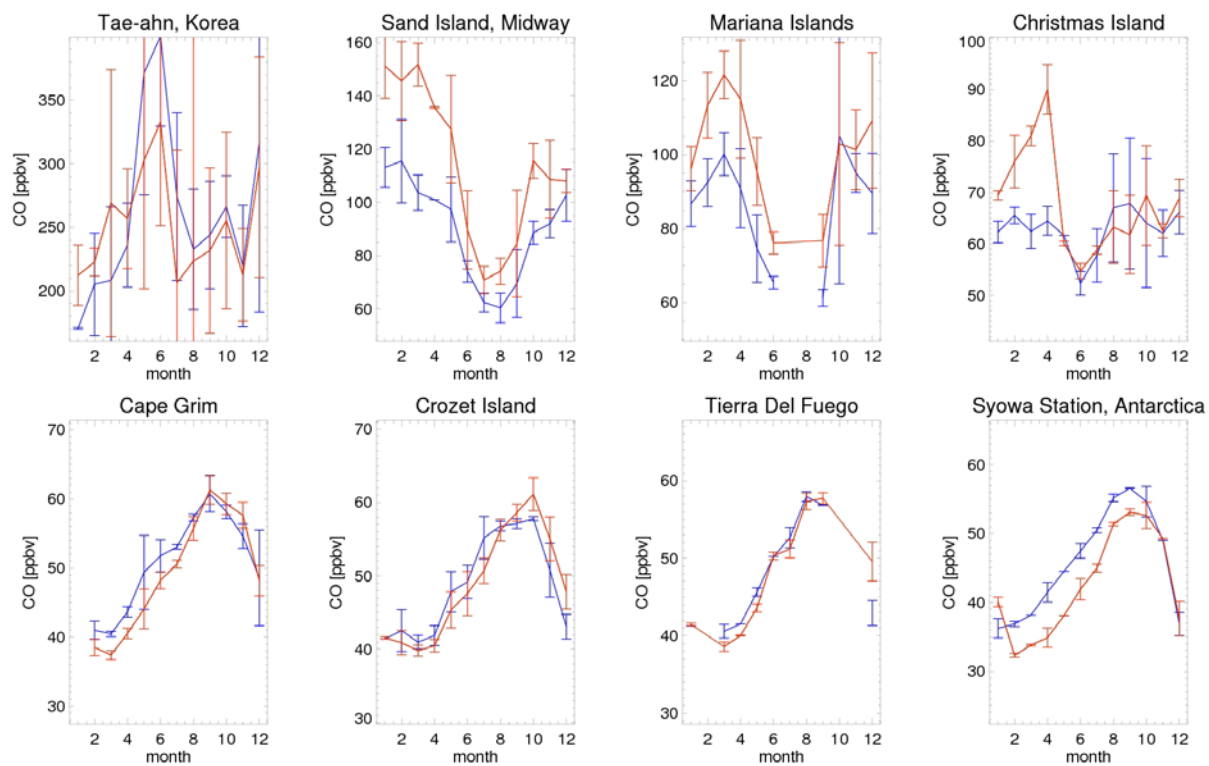

Figure S1. Continued.

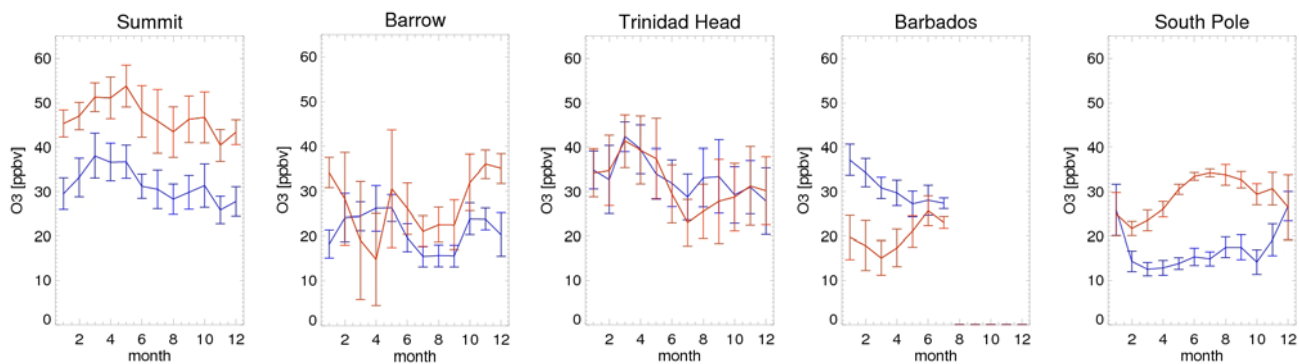

Figure S2. A comparison of the monthly mean concentrations in surface O<sub>3</sub> concentrations from TM5 (blue) to GMD station measurements (red). Model data has been sampled at the time of the observations and the bars indicate the standard deviations of the monthly mean.

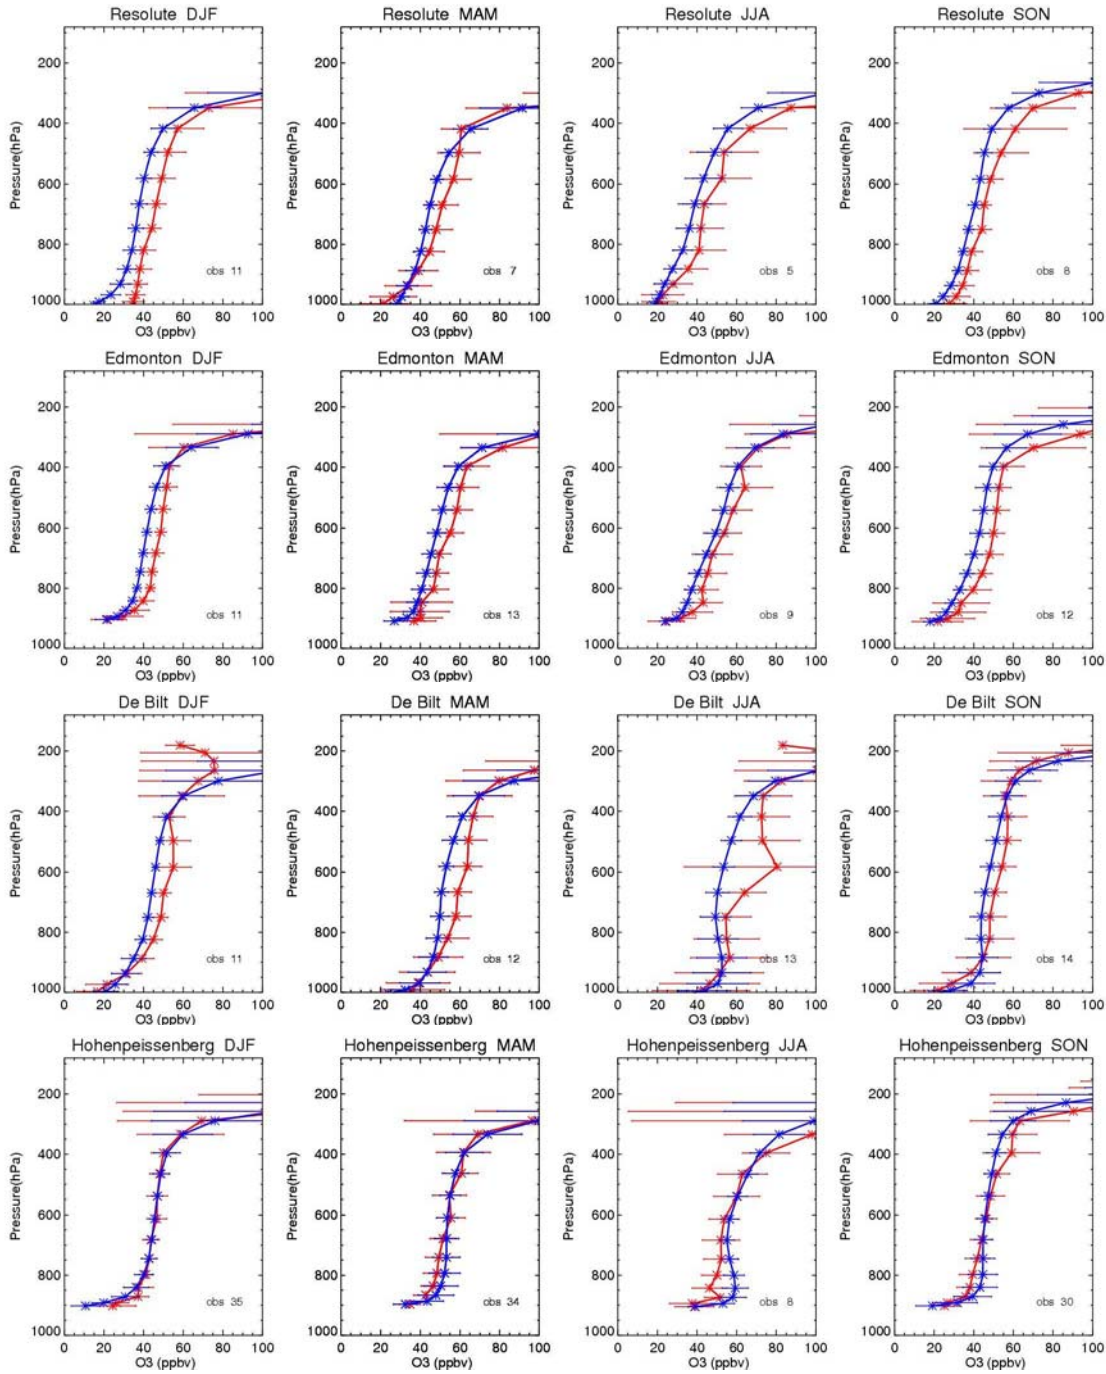

Figure S3. Comparison of seasonally averaged modeled ozone profiles (blue) to WOUDC sonde observations (red). The bars indicate the standard deviations of the monthly mean. Stations are: Resolute (74°N, 95°W), Edmonton (53°N, 114°W), De Bilt (52°N, 5°E), Hohenpeissenberg (47°N, 11°E), Naha (26°N, 127°E), Cotonou (6°N, 2°E), Paramaribo (5°N, 55°W), San Christobal (0°S, 89°W), Sepang Airport (2°N, 101°E), Nairobi (1°S, 36°E), Natal (5°S, 35°W), Samoa (14°S, 170°W), La Reunion (21°S, 55°E), Neumayer (70°S, 8°W).

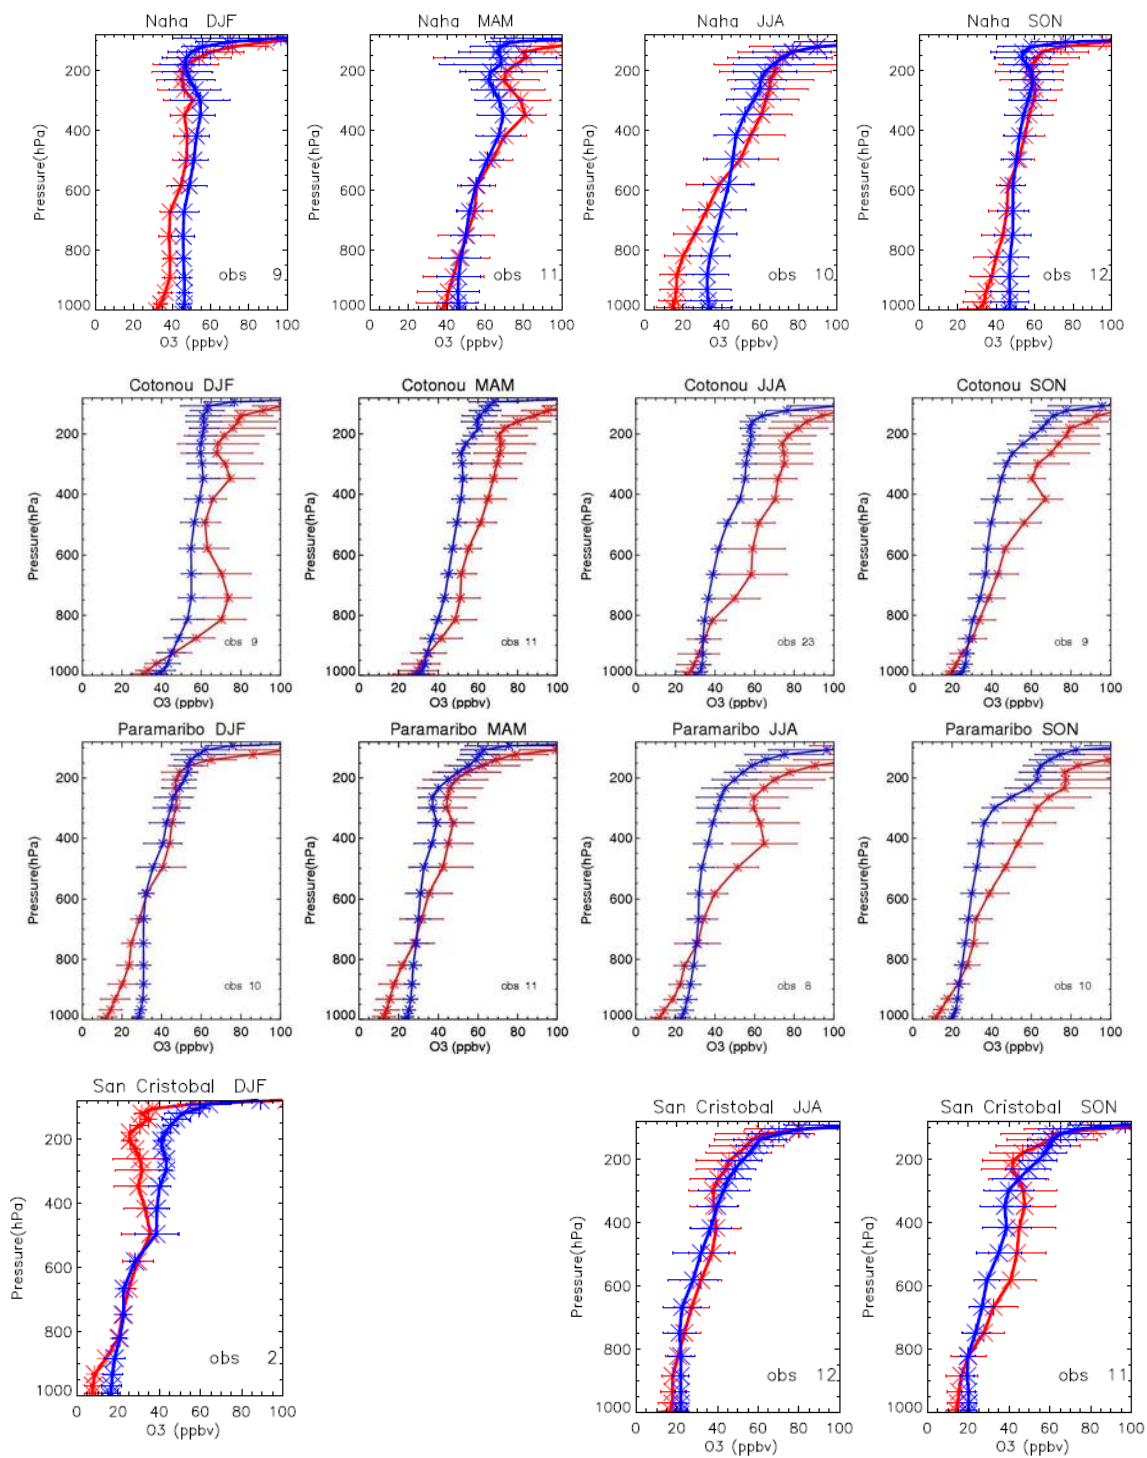

Figure S3. Continued.



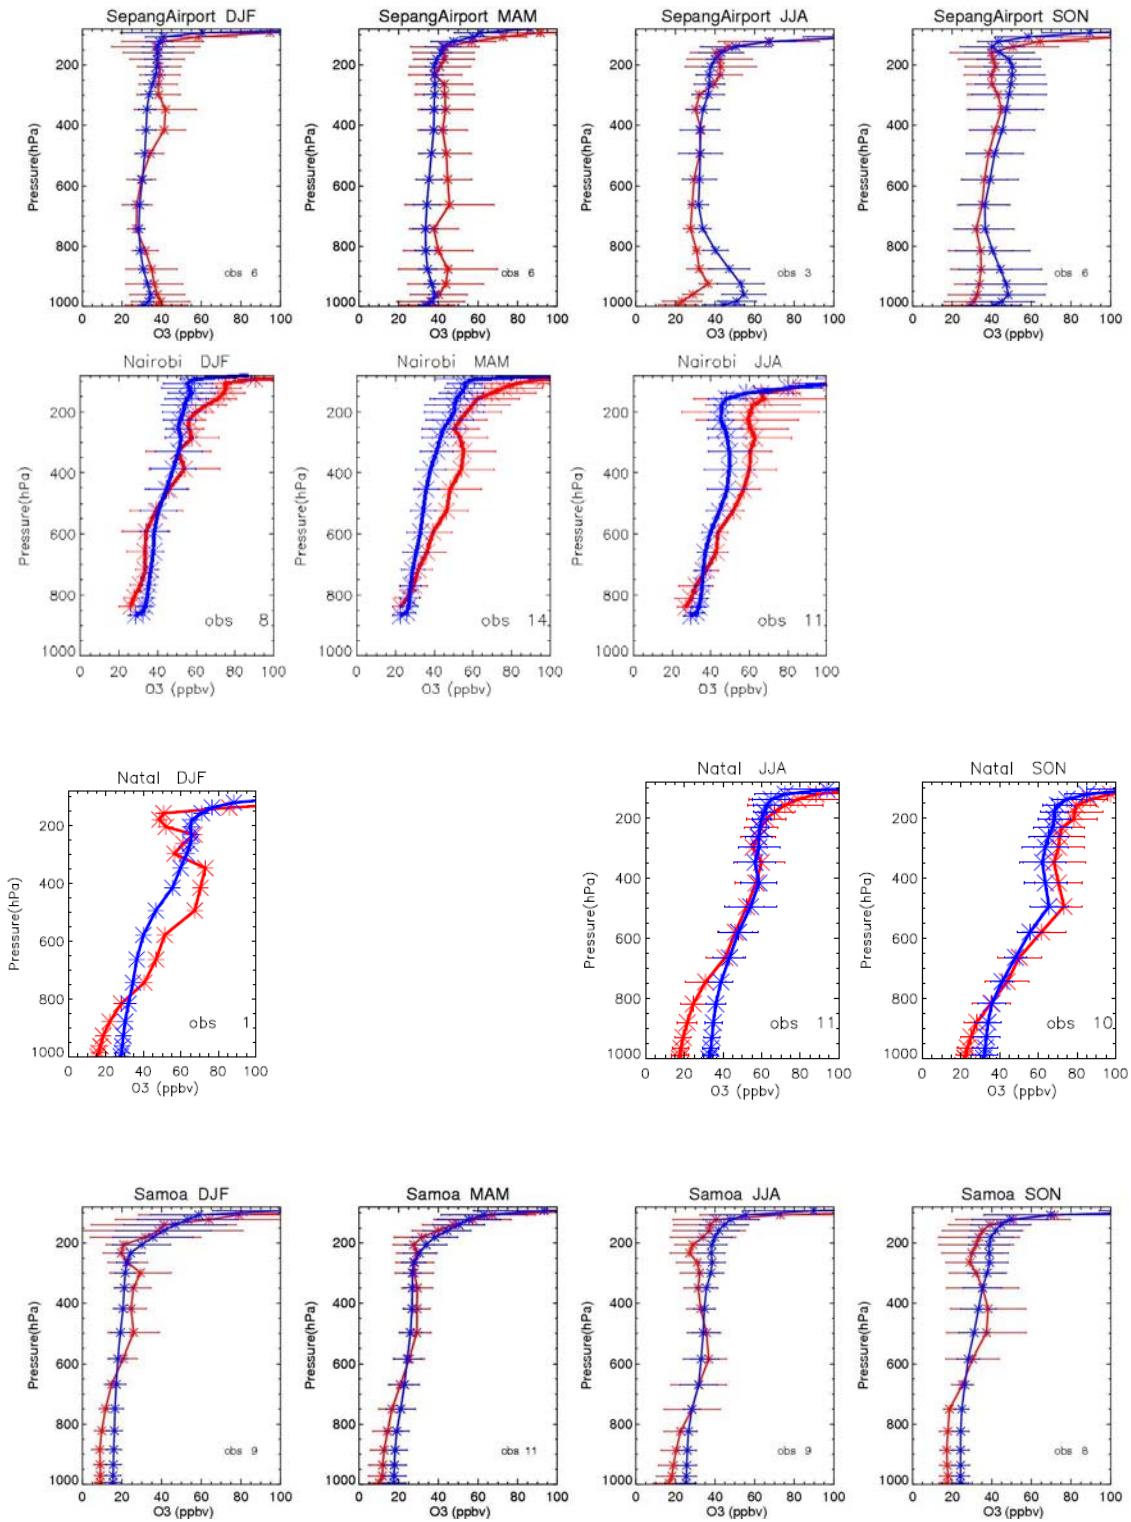

Figure S3. Continued.

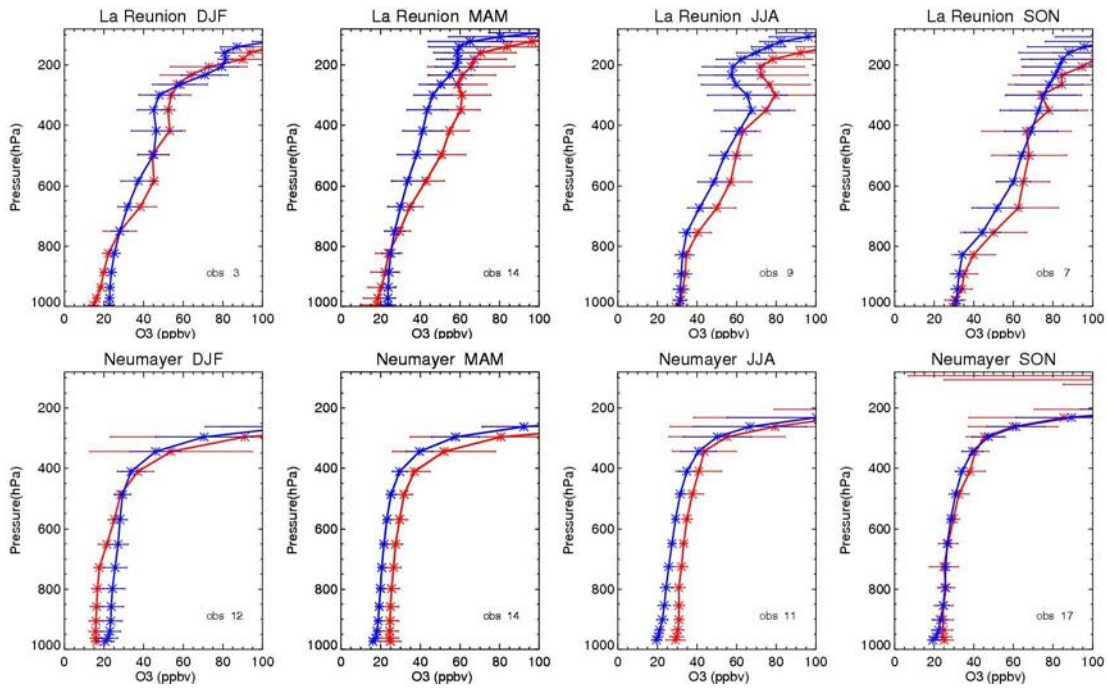

Figure S3. Continued.
